# Supplementary material
Source: PubMed Central journal article supplement (PMC2798899)

**Total Synthesis and Evaluation of C26-Hydroxyepothilone D Derivatives  
for Photoaffinity Labeling of  $\beta$ -Tubulin**

Emily A. Reiff,<sup>a</sup> Sajiv K. Nair,<sup>a</sup> John T. Henri,<sup>a</sup> Jack F. Greiner,<sup>a</sup> Bollu S. Reddy,<sup>a</sup> Ramappa  
Chakrasali,<sup>a</sup> Sunil A. David,<sup>a</sup> Ting-Lan Chiu,<sup>c</sup>  
Elizabeth A. Amin,<sup>c</sup> Richard H. Himes,<sup>b</sup> David Vander Velde,<sup>a</sup> and Gunda I. Georg<sup>c\*</sup>

<sup>a</sup>*Department of Medicinal Chemistry, University of Kansas,  
1251 Wescoe Hall Drive, Lawrence, KS 66045, USA*

<sup>b</sup>*Department of Molecular Bioscience, University of Kansas,  
1200 Sunnyside Avenue, Lawrence, KS 66045, USA*

<sup>c</sup>*Department of Medicinal Chemistry, University of Minnesota,  
717 Delaware Street SE, Minneapolis, MN 55414, USA*

## Supporting Information

### Table of Contents

|                                                 |     |
|-------------------------------------------------|-----|
| General Methods                                 | S2  |
| <sup>1</sup> H NMR spectrum of <b>3</b> .....   | S3  |
| <sup>13</sup> C NMR spectrum of <b>3</b> .....  | S4  |
| <sup>1</sup> H NMR spectrum of <b>4</b> .....   | S5  |
| <sup>13</sup> C NMR spectrum of <b>4</b> .....  | S6  |
| <sup>1</sup> H NMR spectrum of <b>9</b> .....   | S7  |
| <sup>13</sup> C NMR spectrum of <b>9</b> .....  | S8  |
| <sup>1</sup> H NMR spectrum of <b>10</b> .....  | S9  |
| <sup>13</sup> C NMR spectrum of <b>10</b> ..... | S10 |
| <sup>1</sup> H NMR spectrum of <b>14</b> .....  | S11 |
| <sup>13</sup> C NMR spectrum of <b>14</b> ..... | S12 |
| <sup>1</sup> H NMR spectrum of <b>15</b> .....  | S13 |
| <sup>13</sup> C NMR spectrum of <b>15</b> ..... | S14 |
| <sup>1</sup> H NMR spectrum of <b>16</b> .....  | S15 |
| <sup>13</sup> C NMR spectrum of <b>16</b> ..... | S16 |

**General Methods.** All NMR spectra were acquired using either a 400 MHz (100 MHz) NMR or a 500 MHz (125 MHz) instrument and samples were dissolved in CDCl<sub>3</sub>. All of the compounds prepared were oils unless specifically mentioned in the text. Infrared spectra were obtained using the oils on NaCl plates on a FT-IR. Optical rotations were obtained on a Polarimeter at 20 °C. Chemical ionization mass spectra were obtained on a quadrupole GC/MS system. Fast atom bombardment mass spectra were obtained on a mass spectrometer using a Xenon gun. Exact mass experiments were carried out on this instrument at 1:10,000 resolution using linear voltage scans. A HPLC system was used with a Chiracel OD-H column to determine the enantiomeric excess for the catalytic asymmetric reductions for **5** and **10**. All reagents were purchased and used without further purification unless mentioned specifically. THF and Et<sub>2</sub>O were distilled from sodium benzophenone ketyl and CH<sub>2</sub>Cl<sub>2</sub> from calcium hydride. All moisture sensitive reactions were conducted under a positive argon or nitrogen pressure. Column chromatography was carried out on silica gel 60 with a 0.040-0.063 particle size (230-400 mesh). TLCs were recorded on silica gel 60 F254 aluminum plates. Preparative chromatography was done on 1000 micron silica gel GF plates with UV 254.

ppm  
7.5883  
7.5418  
7.3974  
7.3406  
7.3234  
7.2831  
7.0192

4.9999  
4.7244  
4.4882  
4.3357  
4.1894  
4.1716  
4.1535  
4.1339  
4.1161  
3.9254  
3.9099  
3.8942  
3.3657  
3.3480  
3.3024  
3.2847  
2.9145  
2.8982  
2.8907  
2.8820  
2.8756  
2.8606  
1.3945  
1.3768  
1.3635  
1.3593  
1.3495  
1.3460  
1.3417  
1.3320  
1.3284  
1.3240  
0.9033  
0.9008  
0.8855  
0.8787  
0.0675  
0.0572

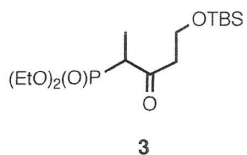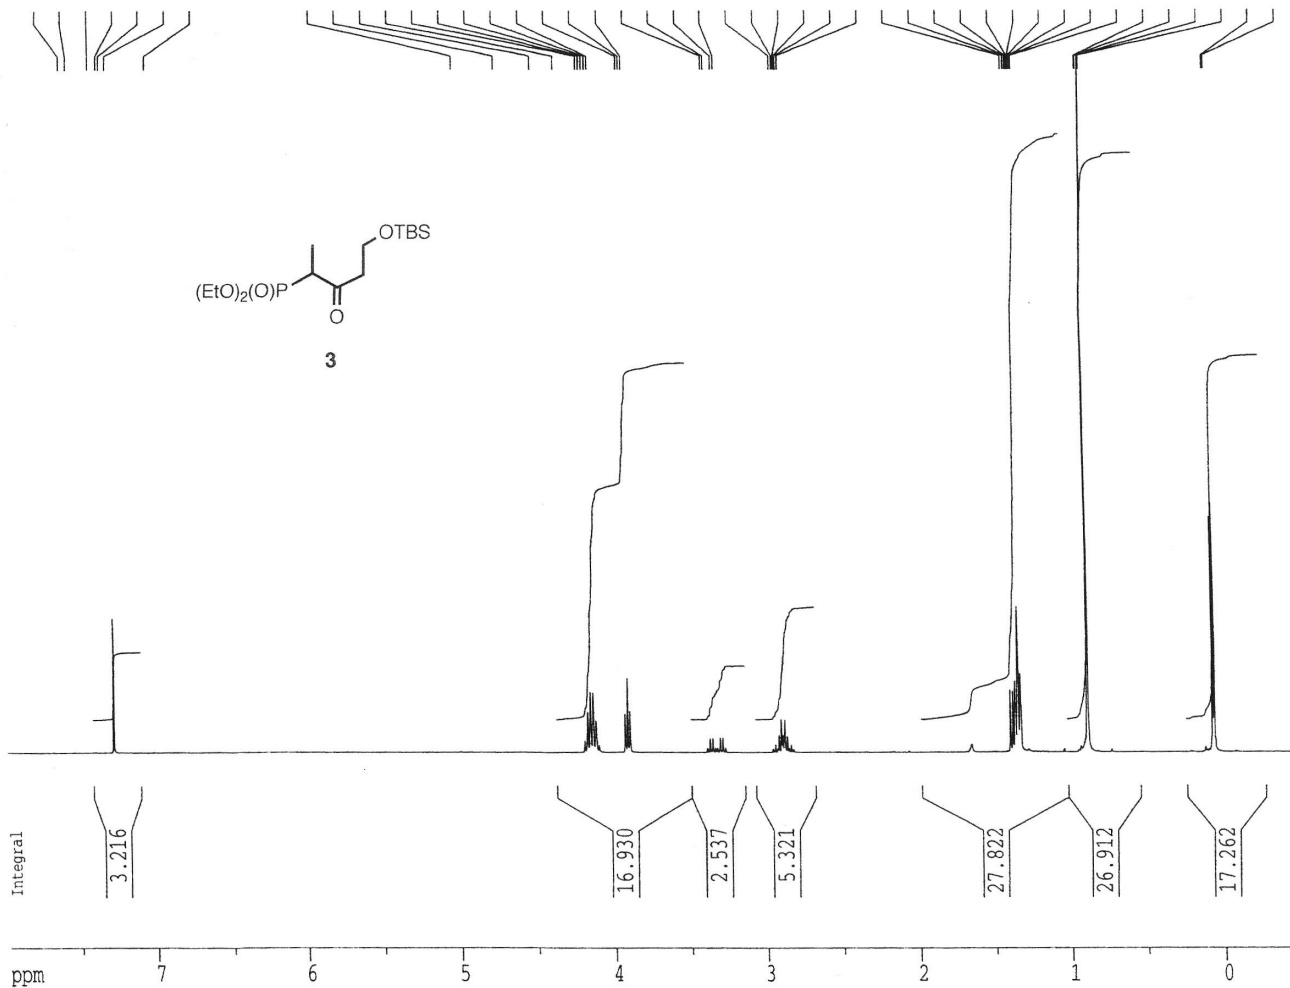

Current Data Parameters  
NAME v-ear-275  
EXPNO 1  
PROCNO 1

F2 - Acquisition Parameters  
Date\_ 20010711  
Time 17.30  
INSTRUM drx400  
PROBHD 5 mm Multinu  
PULPROG zg30  
TD 32768  
SOLVENT CDCl3  
NS 16  
DS 2  
SWH 6410.256 Hz  
FIDRES 0.195625 Hz  
AQ 2.5559540 sec  
RG 228.1  
DW 78.000 usec  
DE 4.50 usec  
TE 300.0 K  
D1 1.00000000 sec

===== CHANNEL f1 =====  
NUC1 1H  
P1 7.70 usec  
PL1 -6.00 dB  
SF01 400.1320007 MHz

F2 - Processing parameters  
SI 16384  
SF 400.1300000 MHz  
WDW EM  
SSB 0  
LB 0.30 Hz  
GB 0  
PC 1.00

1D NMR plot parameters  
CX 20.00 cm  
FIP 8.000 ppm  
F1 3201.04 Hz  
F2P -0.500 ppm  
F2 -200.07 Hz  
PPMCM 0.42500 ppm/cm  
HZCM 170.05525 Hz/cm

5.00  
-205.263  
-205.227

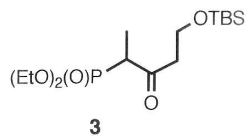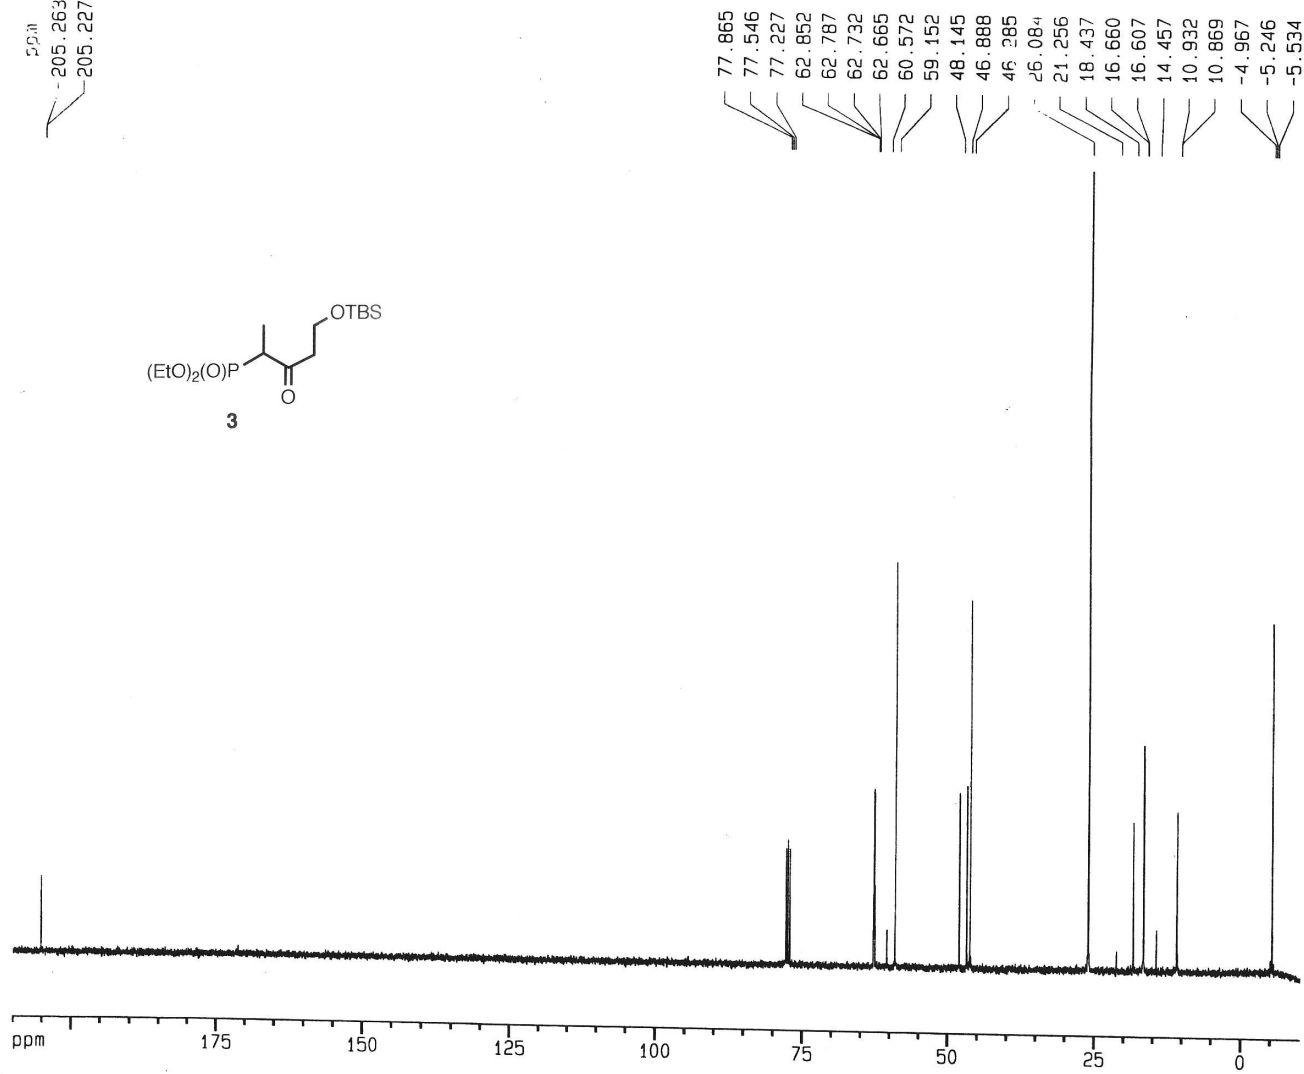

Current Data Parameters  
NAME 1v-44289  
EXPNO 1  
PROCNO 1

F2 - Acquisition Parameters  
Date\_ 10/05/25  
Time 13.57  
INSTRUM drx400  
PROBHD 5 mm Multinu  
PULPROG zgpg30  
TD 65536  
SOLVENT CDCl3  
NS 155  
DS 2  
SWH 23148.148 Hz  
FIDRES 0.353213 Hz  
AQ 1.4156276 sec  
RG 1024  
DW 21.600 usec  
DE 4.50 usec  
TE 300.0 K  
d11 0.3000000 sec  
d12 0.0200000 sec  
PL13 18.00 dB  
D1 0.05000000 sec  
CPDPRG2 waltz16  
PCPD2 100.00 usec  
SFO2 400.1316005 MHz  
NUC2 1H  
PL2 -6.00 dB  
PL12 18.00 dB  
P1 6.90 usec  
DE 4.50 usec  
SFO1 100.6232933 MHz  
NUC1 13C  
PL1 -6.00 dB

F2 - Processing parameters  
SI 32768  
SF 100.6127290 MHz  
WDW EM  
SSB 0  
LB 1.00 Hz  
GB 0  
PC 1.40

1D NMR plot parameters  
CX 20.00 cm  
F1P 210.000 ppm  
F1 21128.67 Hz  
F2P -10.000 ppm  
F2 -1006.13 Hz  
PPMCM 11.00000 ppm/cm  
HZCM 1106.73999 Hz/cm

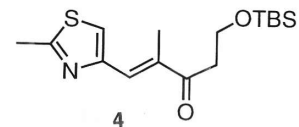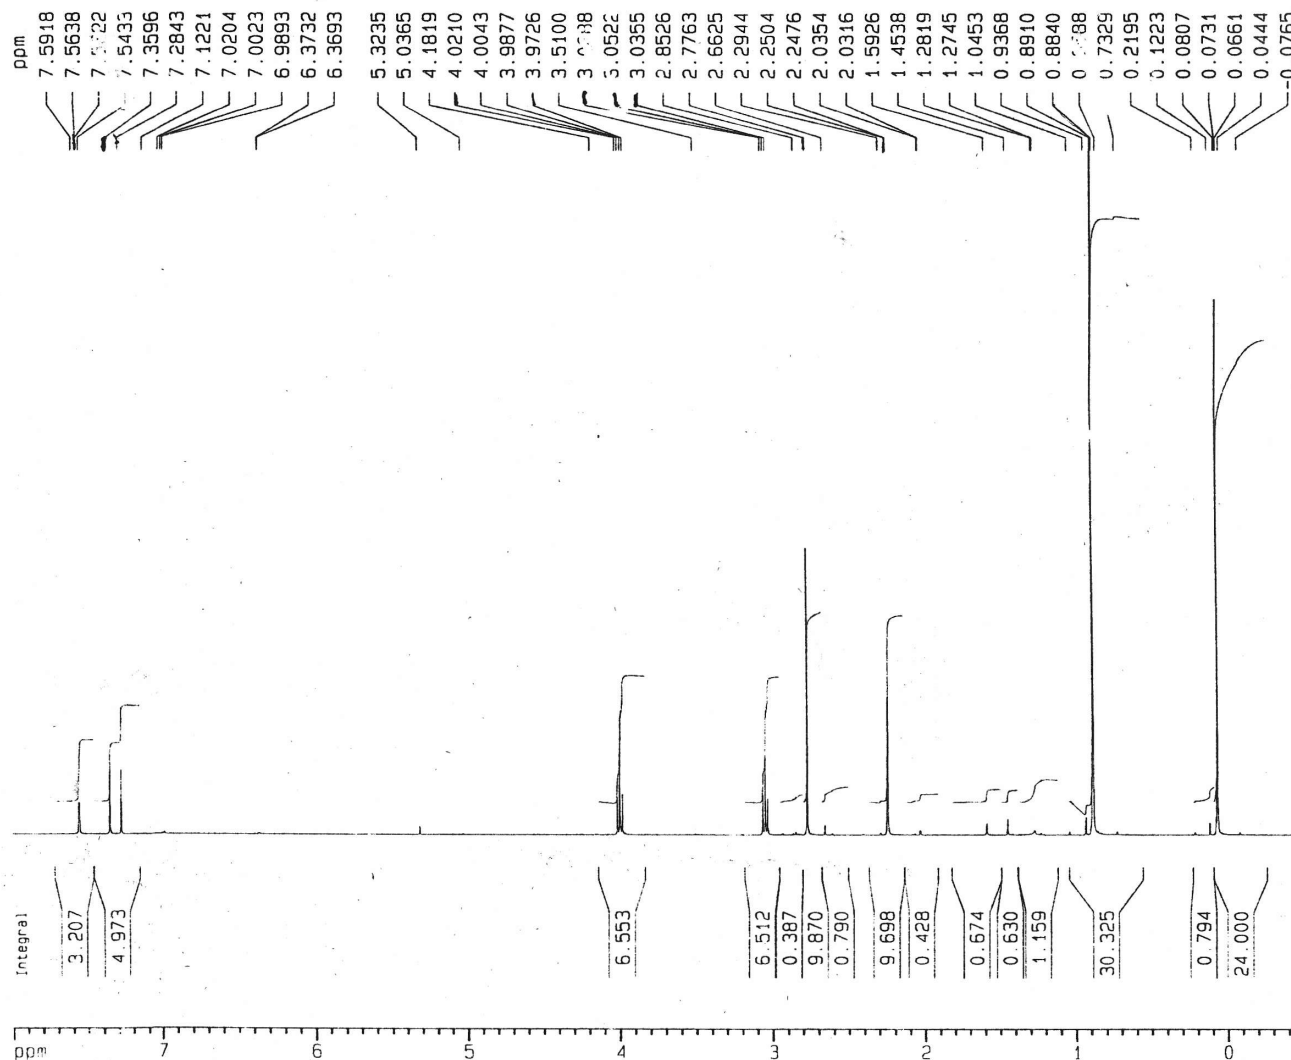

Current Data Parameters

NAME iv-ear-72  
EXPNO 1  
PROCNO 1

F2 - Acquisition Parameters

Date\_ 991011  
Time 14.10  
INSTRUM drx400  
PROBHD 5 mm Multinu  
PULPROG zg30  
TD 32768  
SOLVENT CDCl3  
NS 16  
DS 2  
SWH 6410.256 Hz  
FIDRES 0.195625 Hz  
AQ 2.5559540 sec  
RG 574.7  
DM 78.000 usec  
DE 4.50 usec  
TE 300.2 K  
D1 1.0000000 sec  
P1 7.70 usec  
DE 4.50 usec  
SF01 400.1320007 MHz  
NUC1 1H  
PL1 -6.00 dB

F2 - Processing parameters

SI 16384  
SF 400.1300000 MHz  
WDW EM  
SSB 0  
LB 0.30 Hz  
GB 0  
PC 1.00

1D NMR plot parameters

CX 20.00 cm  
F1P 8.000 ppm  
F1 3201.04 Hz  
F2P -0.500 ppm  
F2 -200.07 Hz  
PPMCM 0.42500 ppm/cm  
HZCM 170.05525 Hz/cm

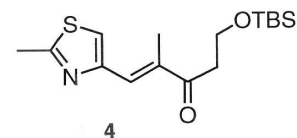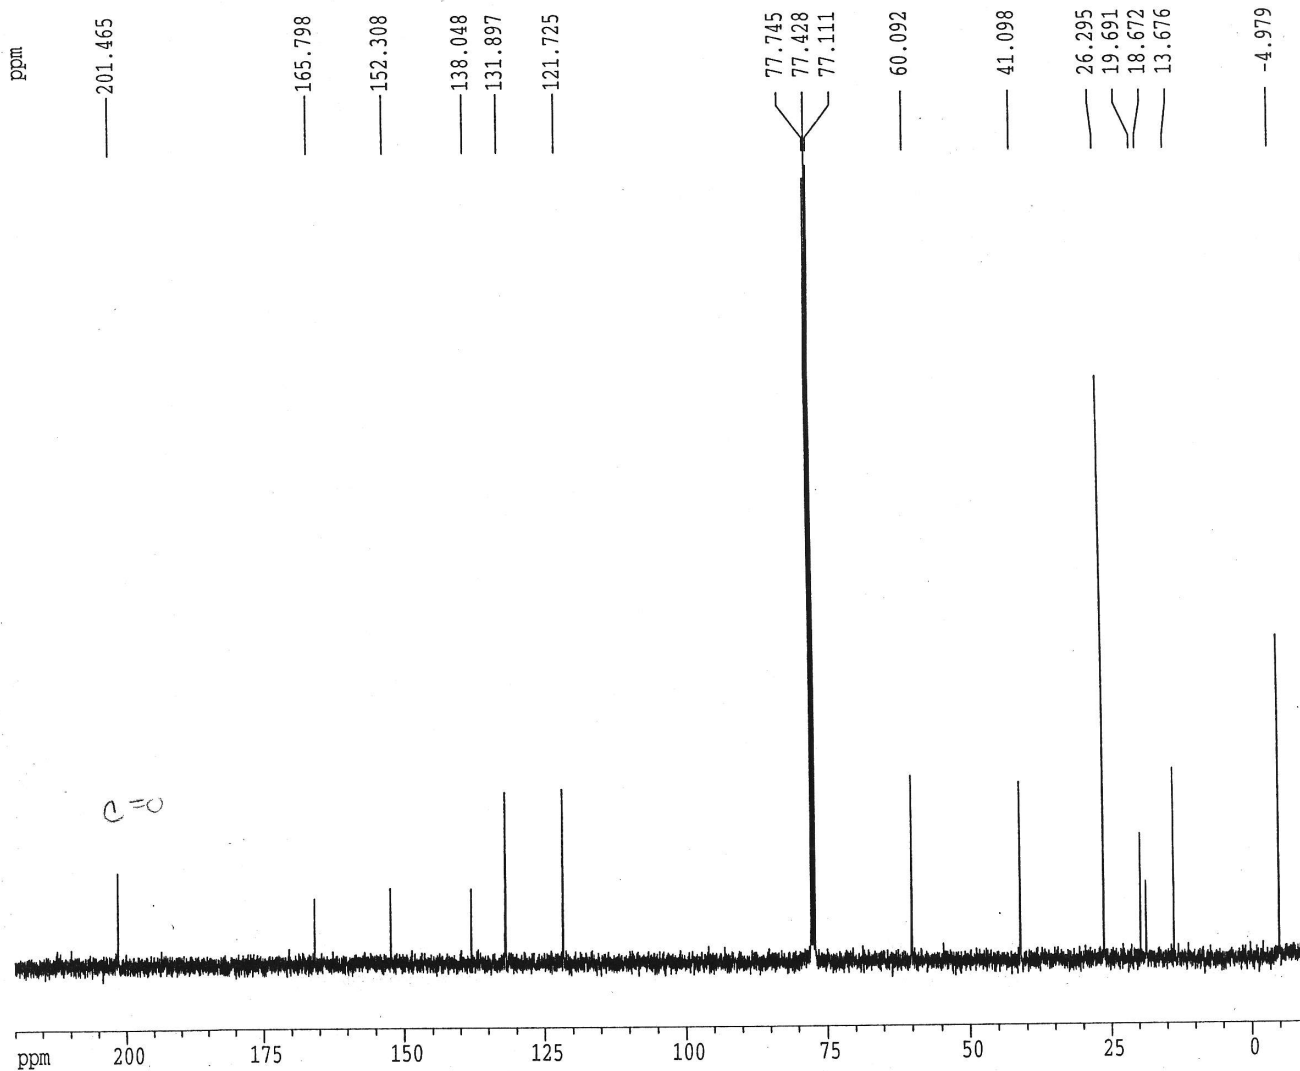

Current Data Parameters  
 NAME v-ear2-79  
 EXPNO 4  
 PROCNO 1

F2 - Acquisition Parameters  
 Date\_ 20000805  
 Time 10.46  
 INSTRUM drx400  
 PROBHD 5 mm Multinu  
 PULPROG zgpg30  
 TD 65536  
 SOLVENT CDCl3  
 NS 793  
 DS 2  
 SWH 23148.148 Hz  
 FIDRES 0.353213 Hz  
 AQ 1.4156276 sec  
 RG 2048  
 DW 21.600 usec  
 DE 4.50 usec  
 TE 300.0 K  
 D1 0.05000000 sec  
 d11 0.03000000 sec  
 d12 0.00002000 sec

===== CHANNEL f1 =====  
 NUC1 13C  
 P1 6.90 usec  
 PL1 -6.00 dB  
 SFO1 100.6232933 MHz

===== CHANNEL f2 =====  
 CPDPRG2 waltz16  
 NUC2 1H  
 PCPD2 100.00 usec  
 PL2 -6.00 dB  
 PL12 18.00 dB  
 PL13 18.00 dB  
 SFO2 400.1316005 MHz

F2 - Processing parameters  
 SI 32768  
 SF 100.6127290 MHz  
 WDW EM  
 SSB 0  
 LB 1.00 Hz  
 GB 0  
 PC 1.40

1D NMR plot parameters  
 CX 20.00 cm  
 F1P 220.036 ppm  
 F1 22138.41 Hz  
 F2P -10.036 ppm  
 F2 -1009.74 Hz  
 PPMCM 11.50359 ppm/cm  
 HZCM 1157.40747 Hz/cm

ii-ear-154  
fractions  
187 mg b-keto ester

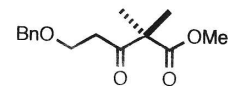

9

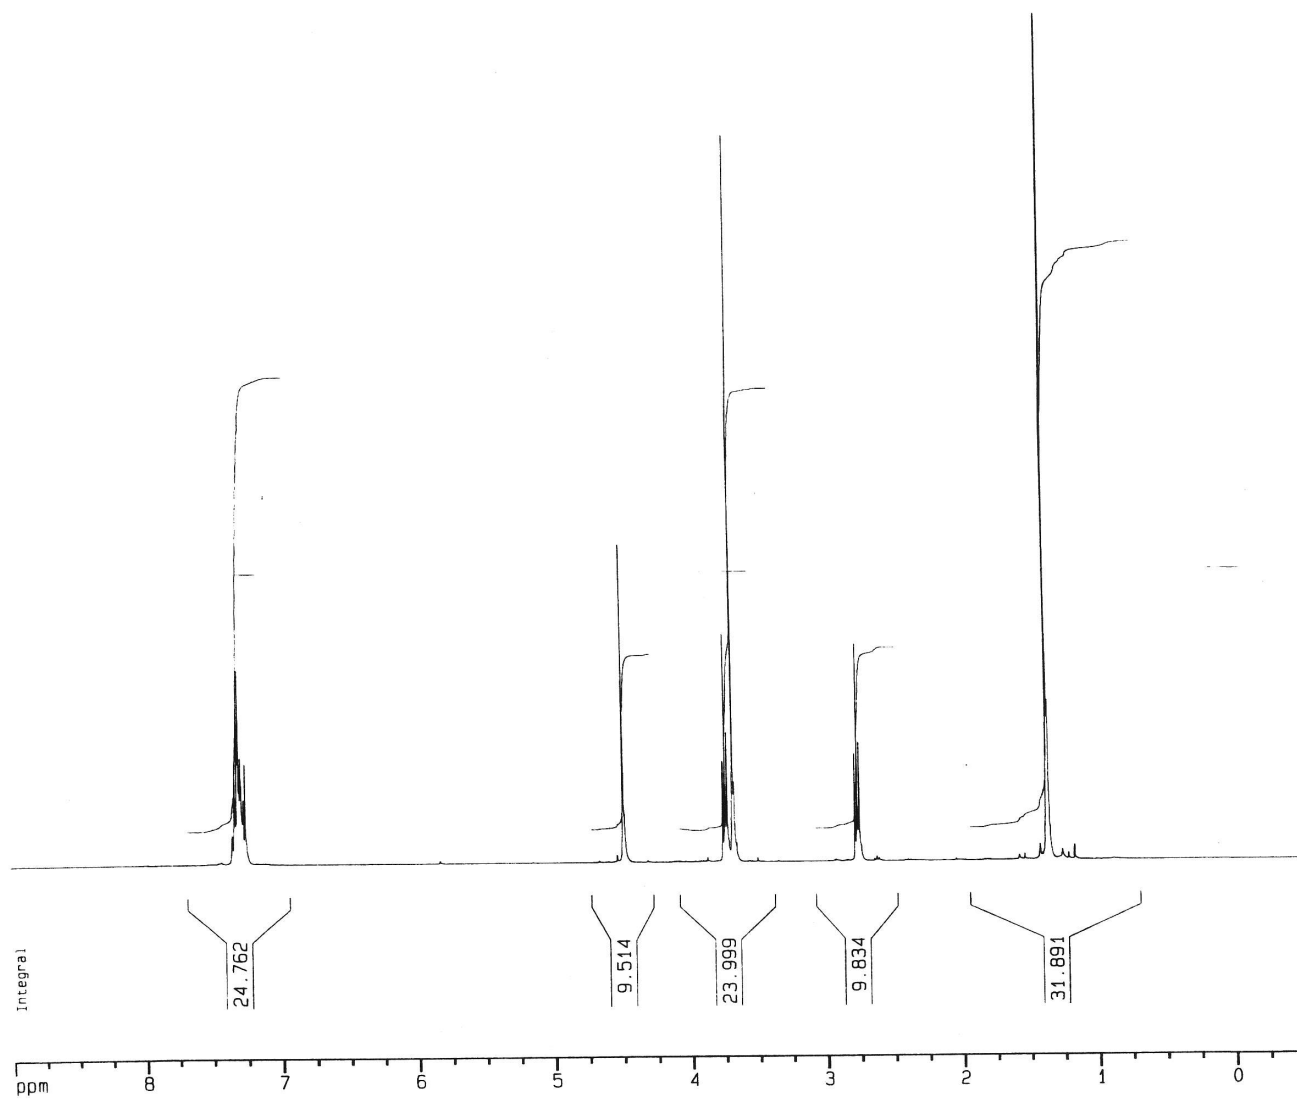

Current Data Parameters  
NAME ear2.155  
EXPNO 1  
PROCNO 1

F2 - Acquisition Parameters  
Date\_ 971118  
Time 15.37  
INSTRUM drx400  
PROBHD 5 mm Multinu  
PULPROG zg30  
TD 32768  
SOLVENT CDC13  
NS 16  
DS 2  
SWH 4789.272 Hz  
FIDRES 0.146157 Hz  
AQ 3.4210291 sec  
RG 256  
DW 104.400 usec  
DE 4.50 usec  
TE 300.0 K  
D1 1.00000000 sec  
P1 7.70 usec  
DE 4.50 usec  
SF01 400.1320007 MHz  
NUC1 1H  
PL1 -6.00 dB

F2 - Processing parameters  
SI 16384  
SF 400.130088 MHz  
WDW EM  
SSB 0  
LB 0.30 Hz  
GB 0  
PC 1.00

1D NMR plot parameters  
CX 20.00 cm  
F1P 9.000 ppm  
F1 3601.17 Hz  
F2P -0.500 ppm  
F2 -200.07 Hz  
PPMCM 0.47500 ppm/cm  
HZCM 190.06175 Hz/cm

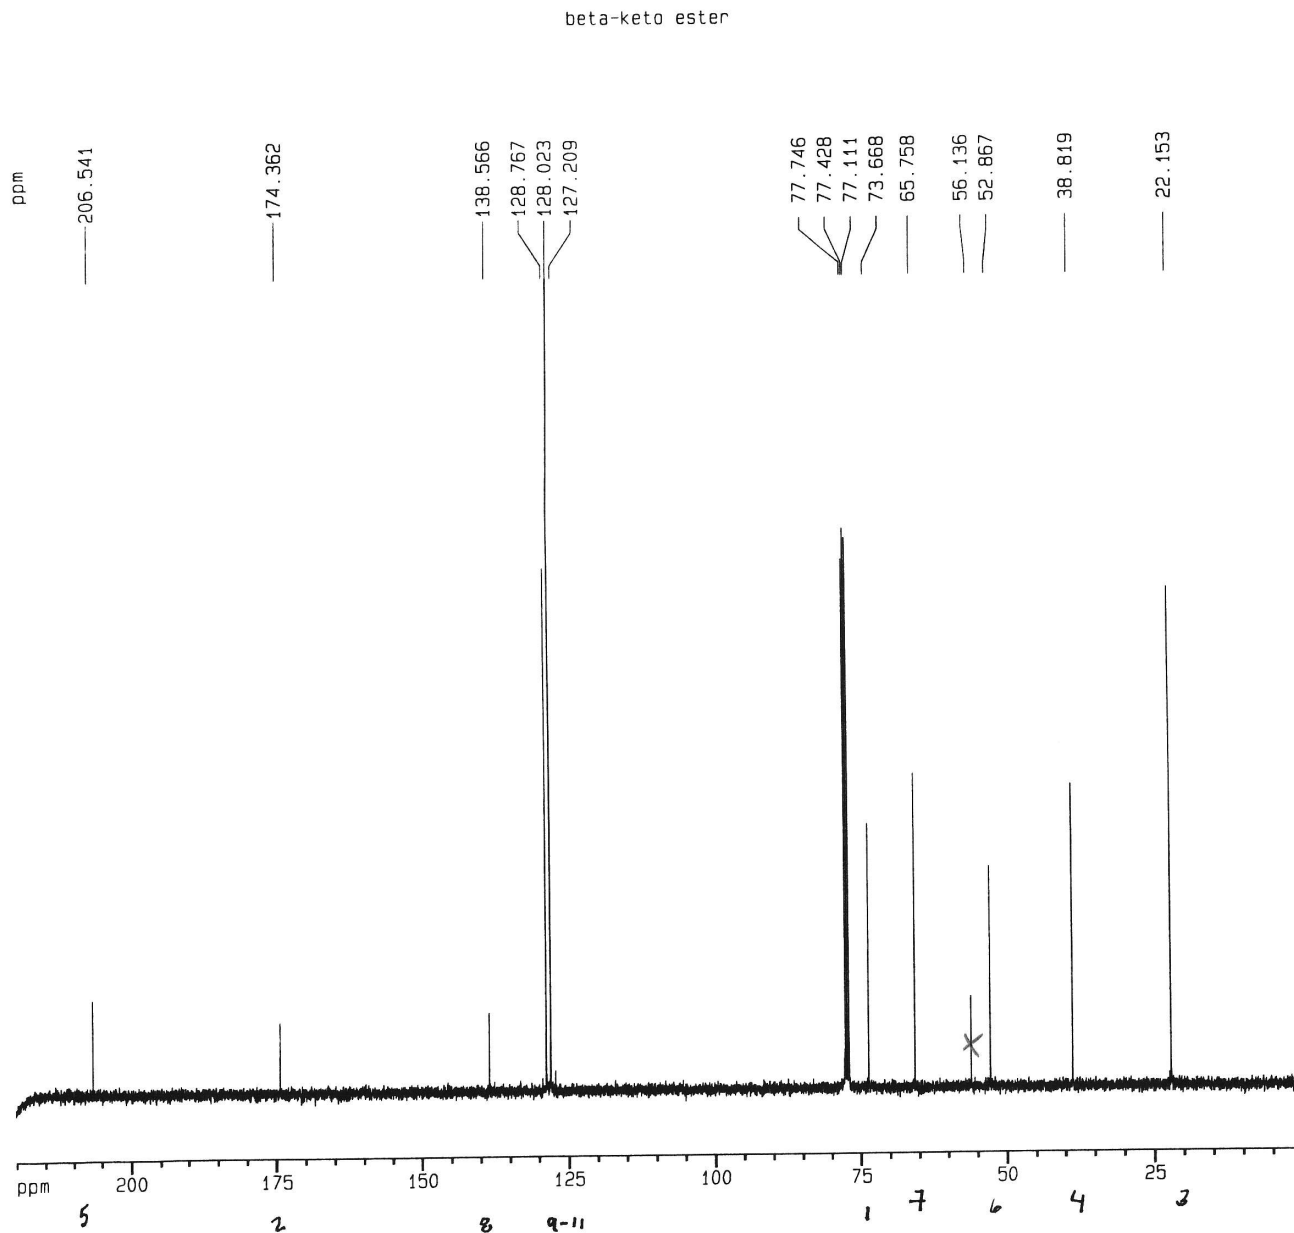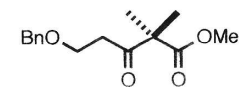

**9**

Current Data Parameters  
 NAME ear2-2-181  
 EXPNO 1  
 PROCNO 1

F2 - Acquisition Parameters  
 Date\_ 980117  
 Time 11.38  
 INSTRUM drx400  
 PROBHD 5 mm Multinu  
 PULPROG zgpg30  
 TD 65536  
 SOLVENT CDCl3  
 NS 1024  
 DS 2  
 SWH 23148.148 Hz  
 FIDRES 0.353213 Hz  
 AQ 1.4156276 sec  
 RG 2048  
 DW 21.600 usec  
 DE 4.50 usec  
 TE 300.0 K  
 d11 0.0300000 sec  
 d12 0.0000200 sec  
 PL13 18.00 dB  
 D1 0.05000000 sec  
 CPDPRG2 waltz16  
 PCPD2 100.00 usec  
 SF02 400.1316005 MHz  
 NUC2 1H  
 PL2 -6.00 dB  
 PL12 18.00 dB  
 P1 6.90 usec  
 DE 4.50 usec  
 SF01 100.6232933 MHz  
 NUC1 13C  
 PL1 -6.00 dB

F2 - Processing parameters  
 SI 32768  
 SF 100.6127290 MHz  
 WDW EM  
 SSB 0  
 LB 1.00 Hz  
 GB 0  
 PC 1.40

1D NMR plot parameters  
 CX 20.00 cm  
 F1P 220.000 ppm  
 F1 22134.80 Hz  
 F2P 0.000 ppm  
 F2 0.00 Hz  
 PPMCM 11.00000 ppm/cm  
 HZCM 1106.73999 Hz/cm



ppm

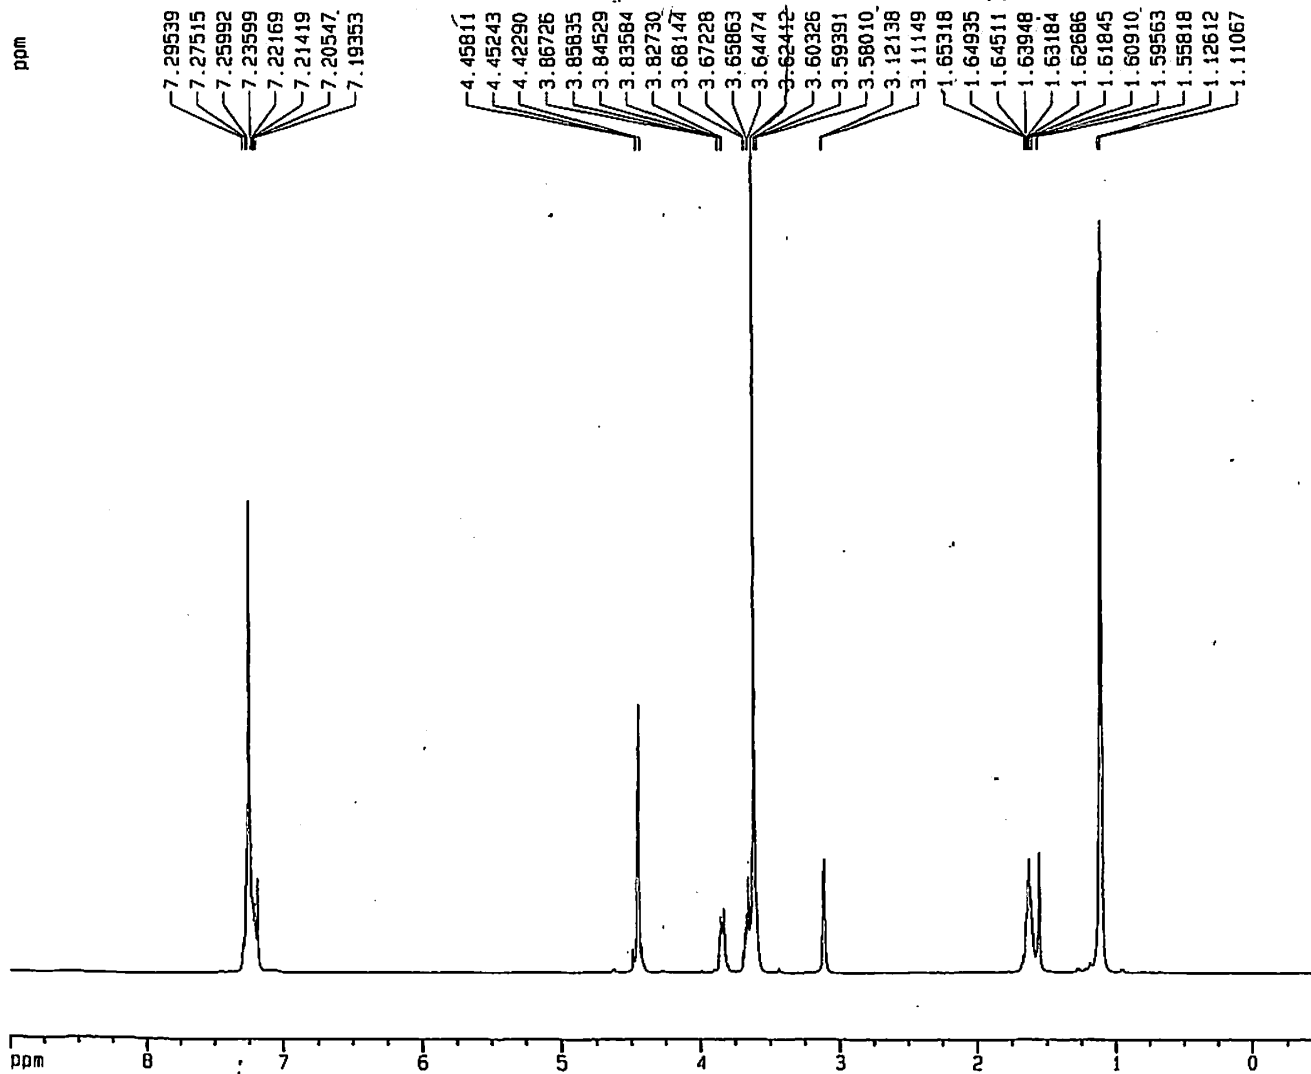

## Current Data Parameters

NAME ear2.197  
EXPNO 1  
PROCNO 1

## F2 - Acquisition Parameters

Date\_ 980117  
Time 11.47  
INSTRUM drx400  
PROBHD 5 mm Multinu  
PULPROG zg30  
TO 32768  
SOLVENT CDCl3  
NS 16  
DS 2  
SWH 4789.272 Hz  
FIDRES 0.146157 Hz  
AQ 3.4210291 sec  
RG 181  
DH 104.400 usec  
DE 4.50 usec  
TE 300.0 K  
D1 1.0000000 sec  
P1 7.70 usec  
DE 4.50 usec  
SFO1 400.1320007 MHz  
NUC1 1H  
PL1 -6.00 dB

## F2 - Processing parameters

SI 32768  
SF 400.1300492 MHz  
WDW EM  
SSB 0  
LB 1.00 Hz  
GB 0  
PC 1.40

## 1D NMR plot parameters

CX 20.00 cm  
F1P 9.000 ppm  
F1 3601.17 Hz  
F2P -0.500 ppm  
F2 -200.07 Hz  
PPMCM 0.47500 ppm/cm  
HZCM 190.06177 Hz/cm

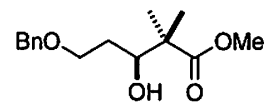

10

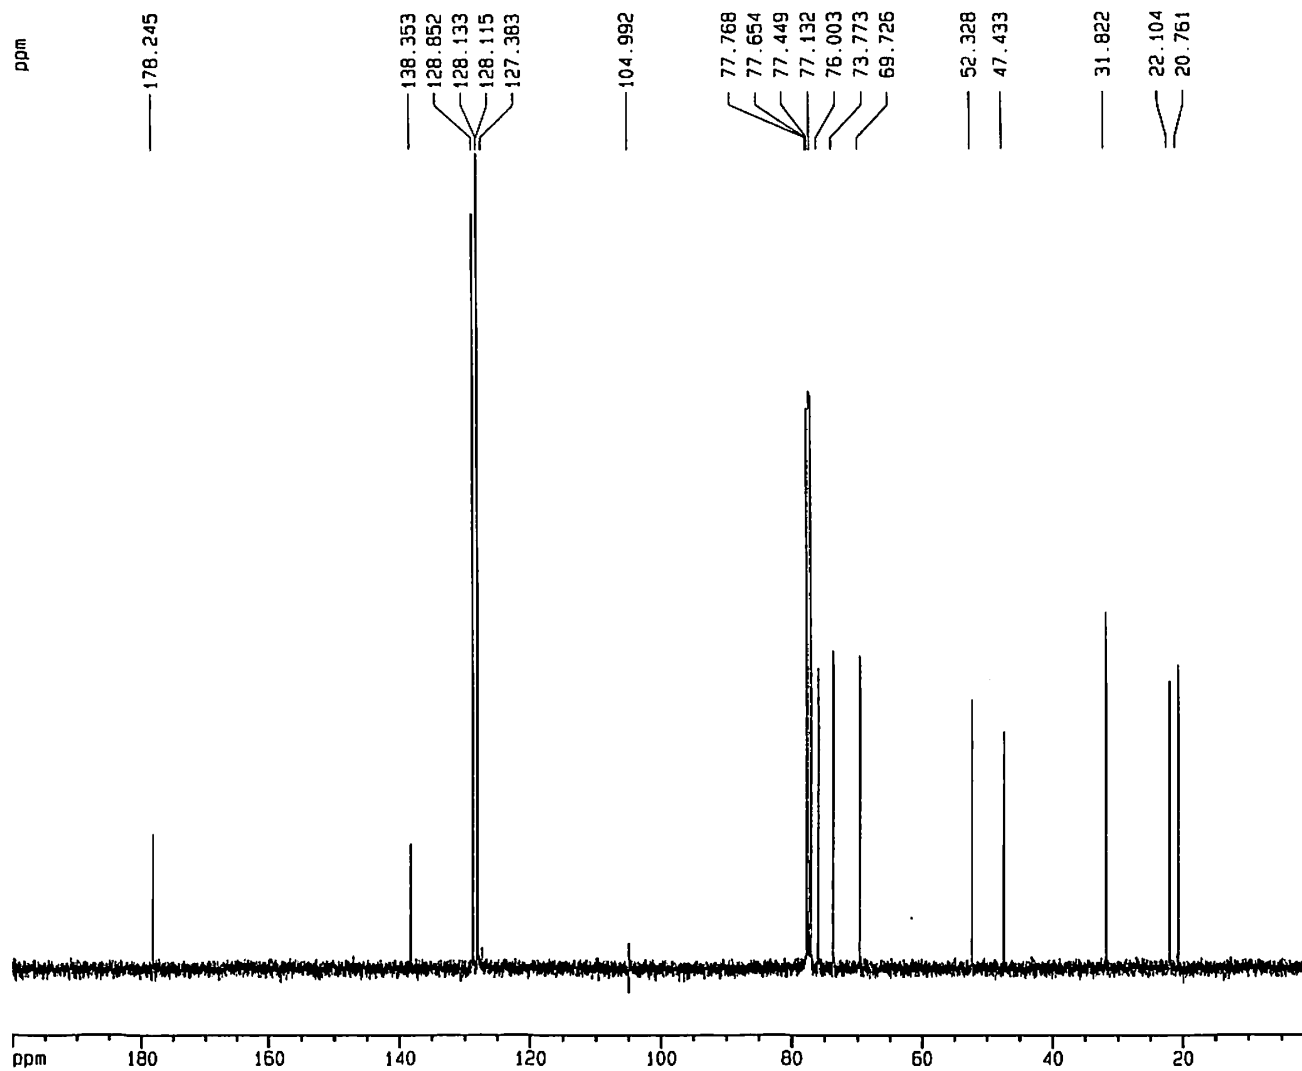

Current Data Parameters  
 NAME 111-ea-260  
 EXPNO 2  
 PROCNO 1

F2 - Acquisition Parameters  
 Date\_ 990623  
 Time 8.56  
 INSTRUM drx400  
 PROBHD 5 mm Multinu  
 PULPROG zgpg30  
 TD 65536  
 SOLVENT COC13  
 NS 945  
 DS 2  
 SMH 23148.148 Hz  
 FIDRES 0.353213 Hz  
 AQ 1.4156276 sec  
 RG 2896.3  
 DW 21.600 usec  
 DE 4.50 usec  
 TE 300.0 K  
 d11 0.0300000 sec  
 d12 0.0000200 sec  
 PL13 18.00 dB  
 O1 0.05000000 sec  
 CPOPRG2 waltz16  
 PCPD2 100.00 usec  
 SF02 400.1316005 MHz  
 NUC2 1H  
 PL2 -6.00 dB  
 PL12 18.00 dB  
 P1 6.90 usec  
 DE 4.50 usec  
 SF01 100.6232933 MHz  
 NUC1 13C  
 PL1 -6.00 dB

F2 - Processing parameters  
 SI 32768  
 SF 100.6127290 MHz  
 NDM EM  
 SSB 0  
 LB 1.00 Hz  
 GB 0  
 PC 1.40

1D NMR plot parameters  
 CX 20.00 cm  
 F1P 200.000 ppm  
 F1 20122.55 Hz  
 F2P 0.000 ppm  
 F2 0.00 Hz  
 PPMCM 10.00000 ppm/cm  
 HZCM 1006.12732 Hz/cm

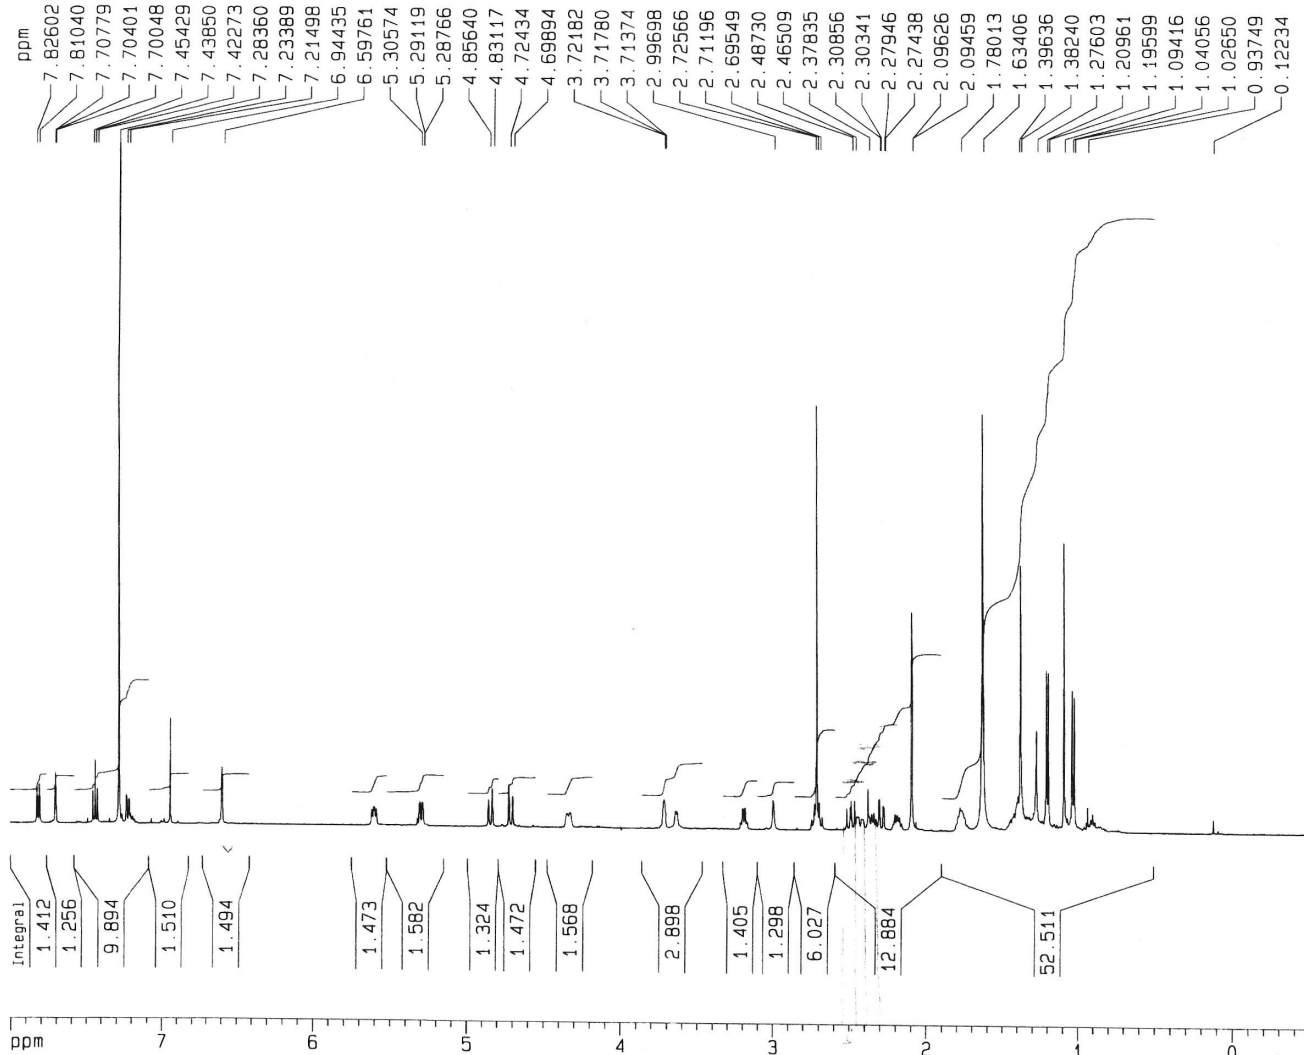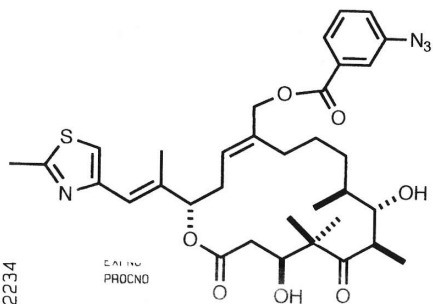

```

NAME
PROCNO

F2 - Acquisition
Date_ 20. 14
Time
INSTRUM spect
PROBHD 5 mm BBO BB-1H
PULPROG zg30
TD 32768
SOLVENT CDC13
NS 65
DS 2
SWH 8012.820 Hz
FIDRES 0.244532 Hz
AQ 2.0448356 sec
RG 1149.4
DW 62.400 usec
DE 6.00 usec
TE 300.0 K
D1 0.03000000 sec

===== CHANNEL f1 =====
NUC1 1H
P1 7.70 usec
PL1 -4.00 dB
SF01 500.1320005 MHz

F1 - Acquisition parameters
NDO 2
TD 256
SF01 500.1325 MHz
FIDRES 23.475060 Hz
SW 12.016 ppm

F2 - Processing parameters
SI 32768
SF 500.1300017 MHz
WDW EM
SSB 0
LB 0.30 Hz
GB 0
PC 1.00

F1 - Processing parameters
SI 1024
MC2 GF
SF 500.1300000 MHz
WDW no
SSB 0
LB 0.30 Hz
GB 0

1D NMR plot parameters
CX 20.00 cm
CY 12.50 cm
F1P 8.000 ppm
F1 4001.04 Hz
F2P -0.500 ppm
F2 -250.07 Hz
PPMCM 0.42500 ppm/cm
HZCM 212.55525 Hz/cm

```

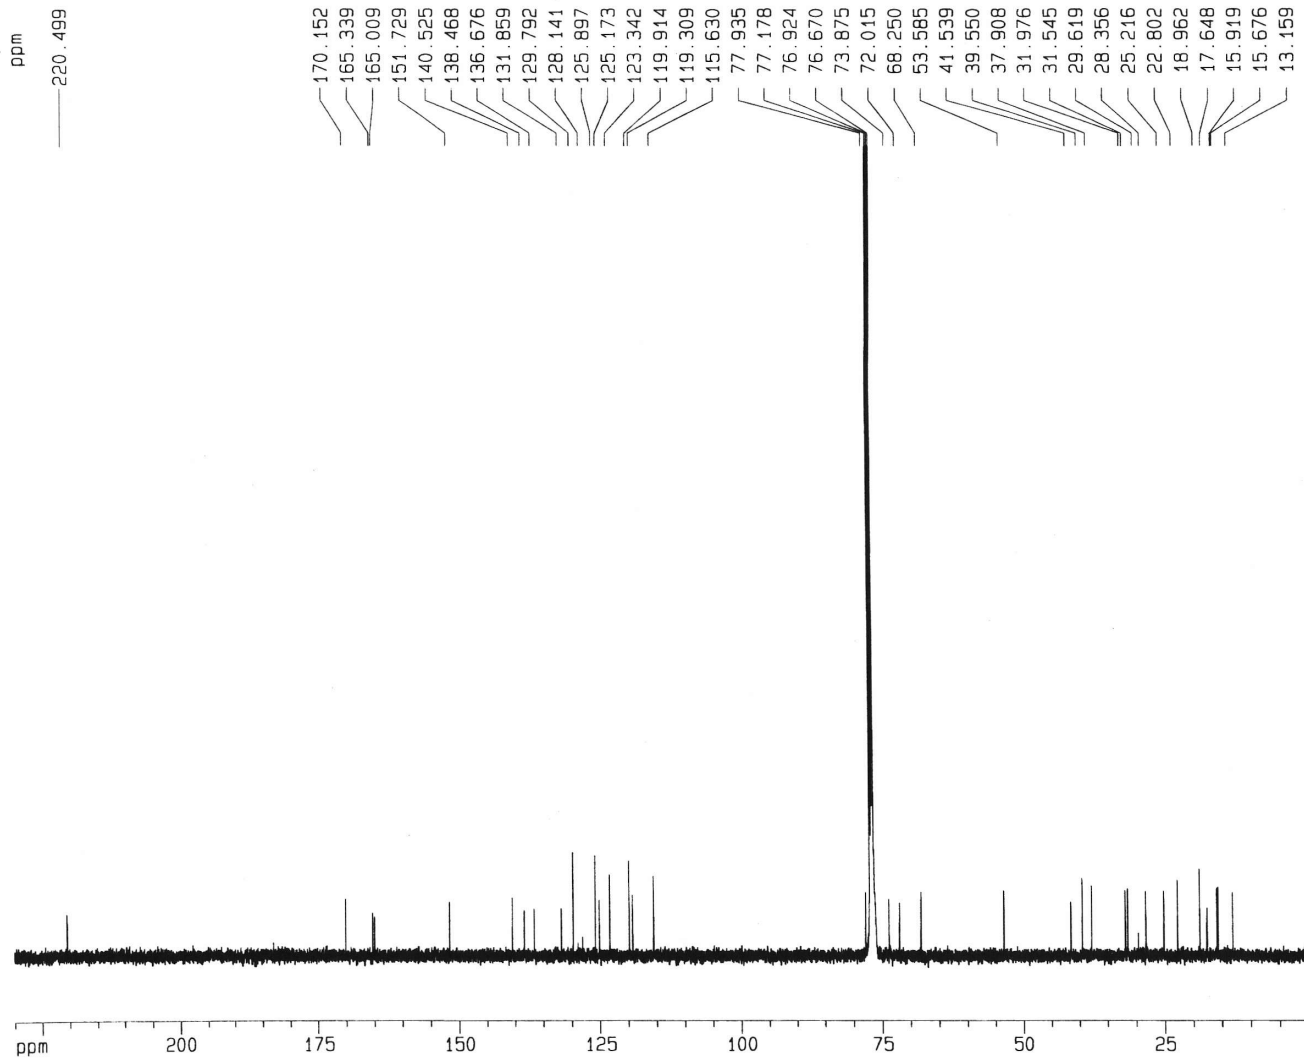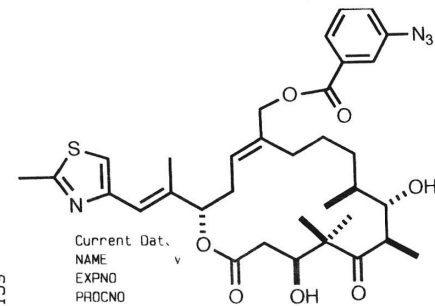

F2 - Acquisition Parameters **14**  
Date\_ 20011024  
Time 8.56  
INSTRUM spect  
PROBHD 5 mm BBO BB-1H  
PULPROG zgpg30  
TD 65536  
SOLVENT CDCl3  
NS 46028  
DS 4  
SWH 31446.541 Hz  
FIDRES 0.479836 Hz  
AQ 1.0420883 sec  
RG 2048  
DW 15.900 usec  
DE 6.00 usec  
TE 300.0 K  
D1 0.10000000 sec  
d11 0.03000000 sec  
d12 0.00002000 sec

===== CHANNEL f1 =====  
NUC1 13C  
P1 6.50 usec  
PL1 5.00 dB  
SF01 125.7719472 MHz

===== CHANNEL f2 =====  
CPDPRG2 waltz16  
NUC2 1H  
PCPD2 95.00 usec  
PL2 17.50 dB  
PL12 19.00 dB  
PL13 30.00 dB  
SF02 500.1325000 MHz

F2 - Processing parameters  
SI 65536  
SF 125.7578008 MHz  
WDW EM  
SSB 0  
LB 1.00 Hz  
GB 0  
PC 1.40

1D NMR plot parameters  
CX 20.00 cm  
CY 0.00 cm  
F1P 230.000 ppm  
F1 28924.29 Hz  
F2P 0.000 ppm  
F2 0.00 Hz  
PPMCM 11.50000 ppm/cm  
HZCM 1446.21472 Hz/cm

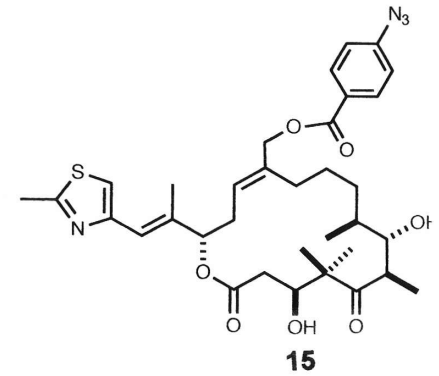

Time 17.45  
 INSTRUM drx400  
 PROBHD 5 mm Multinu  
 PULPROG zg30  
 TD 32768  
 SOLVENT CDCl3  
 NS 81  
 DS 2  
 SWH 6410.256 Hz  
 FIDRES 0.195625 Hz  
 AQ 2.5559540 sec  
 RG 228.1  
 DW 78.000 usec  
 DE 4.50 usec  
 TE 300.0 K  
 D1 1.00000000 sec

===== CHANNEL f1 =====  
 NUC1 1H  
 P1 7.70 usec  
 PL1 -6.00 dB  
 SFO1 400.1320007 MHz

F2 - Processing parameters  
 SI 16384  
 SF 400.1300000 MHz  
 WDW EM  
 SSB 0  
 LB 0.30 Hz  
 GB 0  
 PC 1.00

1D NMR plot parameters  
 CX 20.00 cm  
 FLP 8.000 ppm  
 F1 3201.04 Hz  
 F2P 0.000 ppm  
 F2 0.00 Hz  
 PPMCM 0.40000 ppm/cm  
 HZCM 160.05200 Hz/cm

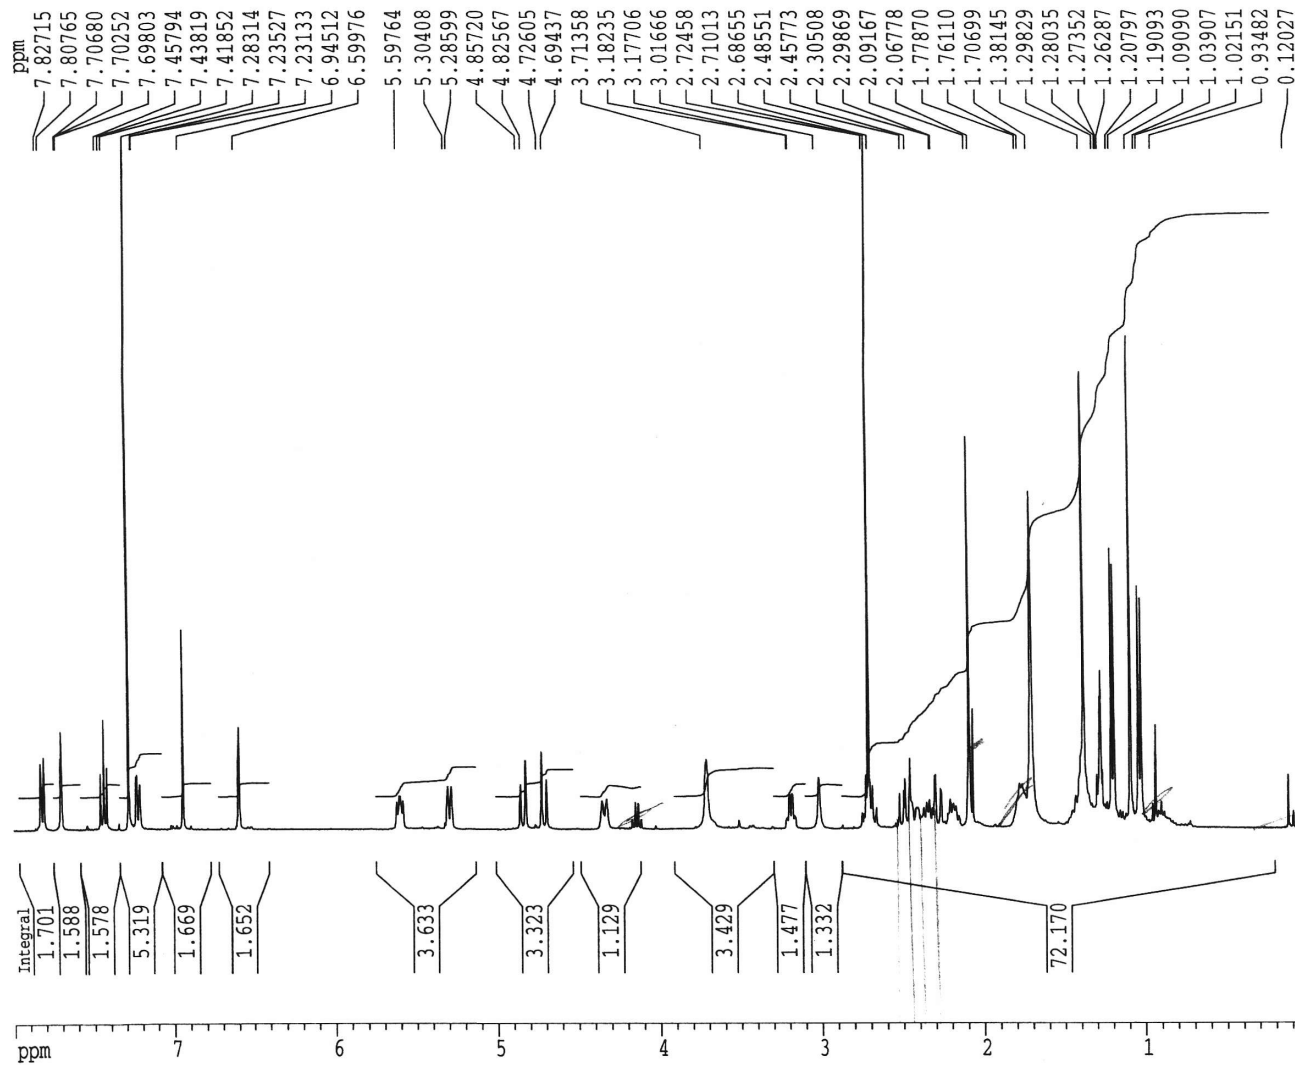

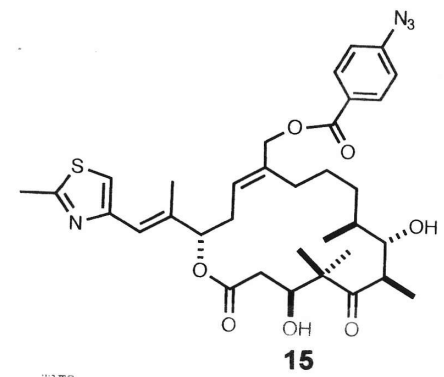

```

time 1.00
INSTRUM drx400
PROBHD 5 mm Multinu
PULPROG zgpg30
TD 65536
SOLVENT CDCl3
NS 34687
DS 2
SWH 26178.010 Hz
FIDRES 0.399445 Hz
AQ 1.2517875 sec
RG 1625.5
DW 19.100 usec
DE 4.50 usec
TE 300.0 K
D1 0.05000000 sec
d11 0.03000000 sec
d12 0.00002000 sec

```

```

===== CHANNEL f1 =====
NUC1 13C
P1 12.30 usec
PL1 2.00 dB
SFO1 100.6232933 MHz

```

```

===== CHANNEL f2 =====
CPDPRG2 waltz16
NUC2 1H
PCPD2 100.00 usec
PL2 0.00 dB
PL12 18.00 dB
PL13 18.00 dB
SFO2 400.1316005 MHz

```

```

F2 - Processing parameters
SI 32768
SF 100.6127290 MHz
WDW EM
SSB 0
LB 1.00 Hz
GB 0
PC 1.40

```

```

1D NMR plot parameters
CX 20.00 cm
F1P 225.000 ppm
F1 22637.87 Hz
F2P 0.000 ppm
F2 0.00 Hz
PPMCM 11.25000 ppm/cm
HZCM 1131.89319 Hz/cm

```

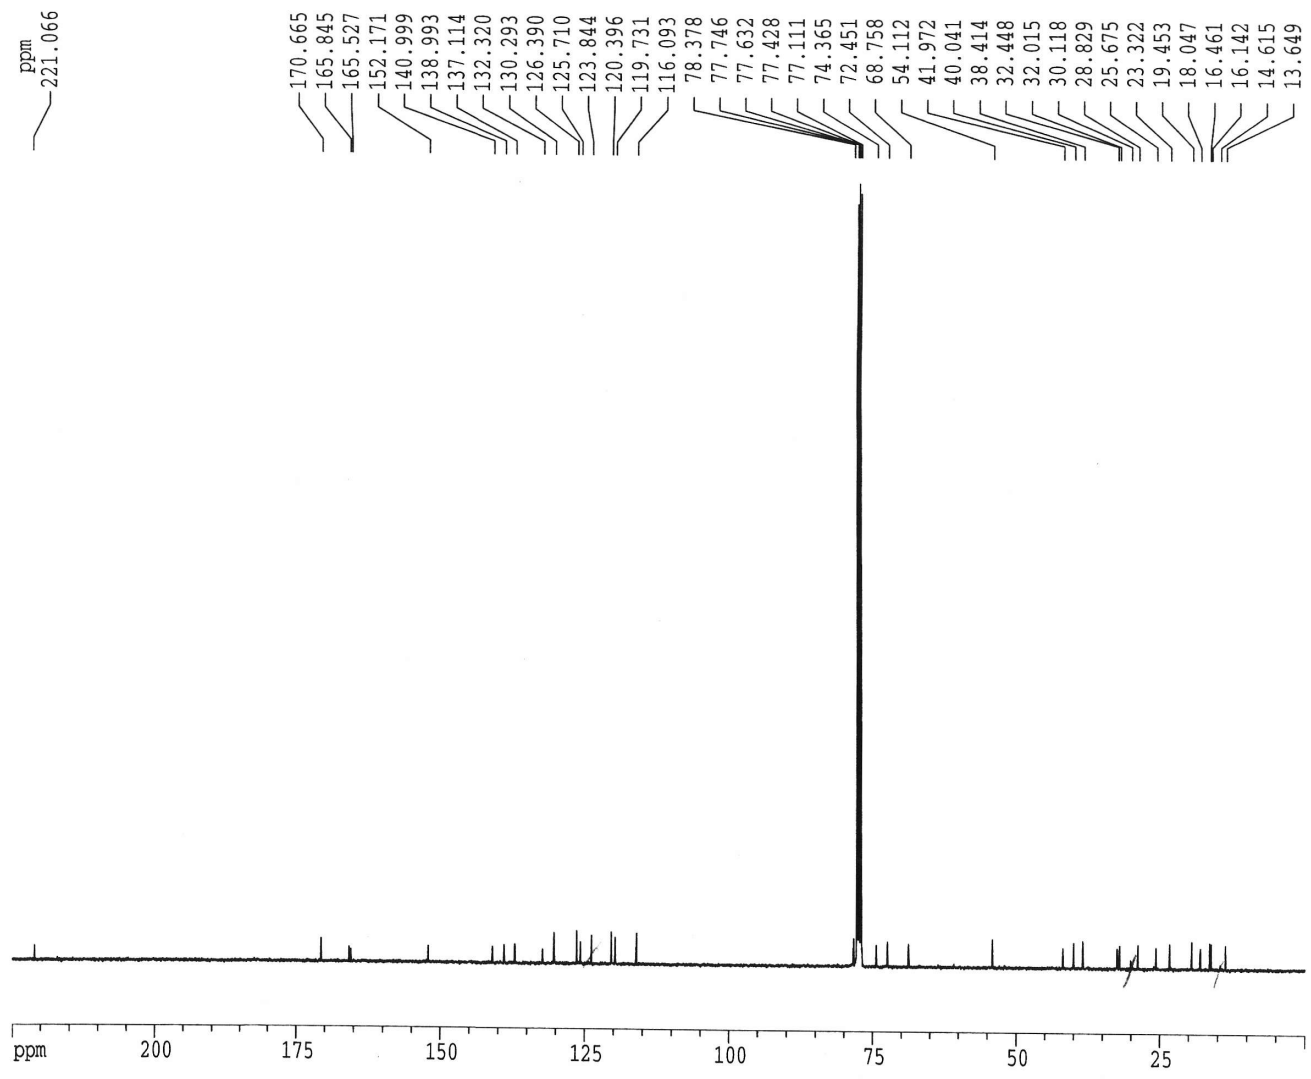

Supplement: NIHMS162954-supplement-1_si_001.pdf [file NIHMS162954-supplement-1_si_001.pdf]
